# Supplementary material
Source: MDPI journal article supplement (https://www.mdpi.com/2073-4344/10/5/582)
Supplement: s1 [file s1]

Supporting Info

# High Temperature Water Gas Shift Reactivity of Novel Perovskite Catalysts

Janko Popovic <sup>1</sup>, Lorenz Lindenthal <sup>1</sup>, Raffael Rameshan <sup>1</sup>, Thomas Ruh <sup>1</sup>, Andreas Nenning <sup>2</sup>, Stefan Löffler <sup>3</sup>, Alexander Karl Opitz <sup>2</sup> and Christoph Rameshan <sup>1,\*</sup>

<sup>1</sup> TU Wien, Institute of Materials Chemistry, Getreidemarkt 9/165-PC, 1060 Vienna, Austria; j.popovic@gmx.net (J.P.); lorenz.lindenthal@tuwien.ac.at (L.L.); raffael.rameshan@tuwien.ac.at (R.R.); thomas.ruh@tuwien.ac.at (T.R.)

<sup>2</sup> TU Wien, Institute of Chemical Technologies and Analytics, Getreidemarkt 9/164-EC, 1060 Vienna, Austria; andreas.nenning@tuwien.ac.at (A.N.); alexander.opitz@tuwien.ac.at (A.K.O.)

<sup>3</sup> TU Wien, USTEM, Wiedner Hauptstr. 8-10/E057-02, 1040 Vienna, Austria; stefan.loeffler@tuwien.ac.at

\* Correspondence: christoph.rameshan@tuwien.ac.at; Tel.: +43-1-58801-165115

Received: 20 April 2020; Accepted: 20 May 2020; Published: date

## 1. Thermodynamic and Equilibrium Calculation for water gas shift (WGS)

For calculation of the curves in Figure S1, the following Equation (1) was used:

$$K_p = \frac{p_{CO_2} \cdot p_{H_2}}{p_{CO} \cdot p_{H_2O}} = \exp\left(\frac{4577,8}{T} - 4,33\right) \quad (1)$$

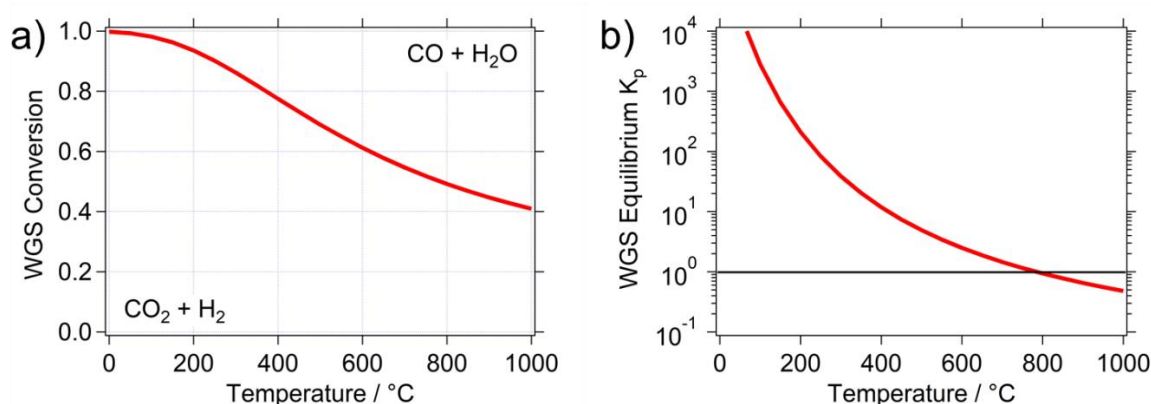

Figure S1: a) Thermodynamic limitation of the water gas shift (WGS) reaction. The higher the reaction temperature, the more pronounced the back reaction via reverse WGS is getting; b) reaction equilibrium plotted on a logarithmic scale plotted in dependence of the reaction temperature. At 800 °C K<sub>p</sub> reaches the value of 1 where a 1:1 ratio of WGS educts and products is expected.

## 2. SEM prior to Catalytic Reaction

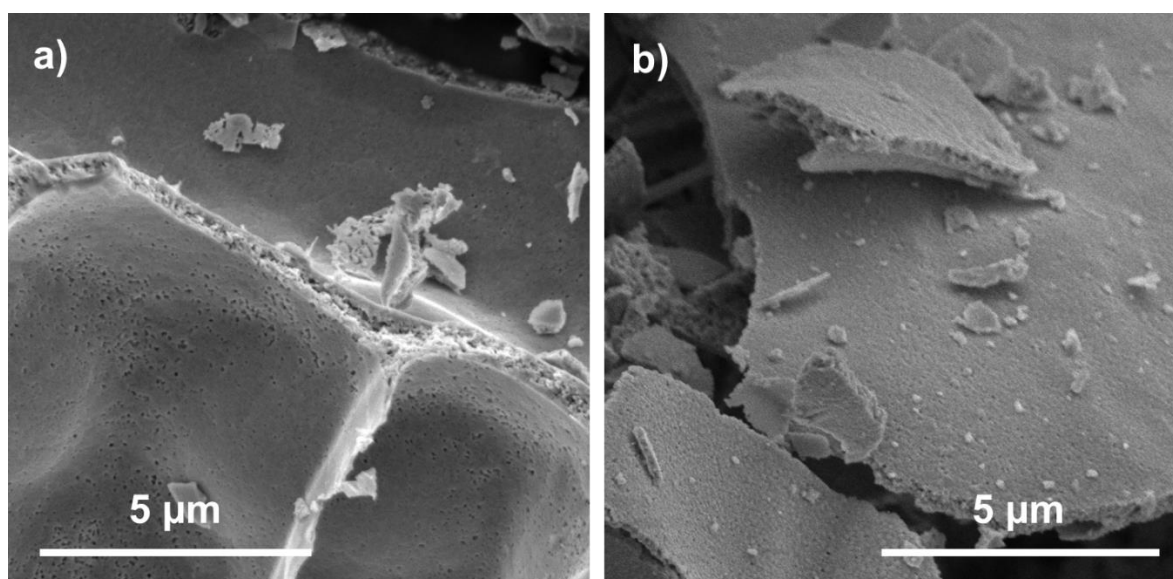

Figure S2: SEM Images of a)  $\text{Nd}_{0.6}\text{Ca}_{0.4}\text{Fe}_{0.9}\text{Co}_{0.1}\text{O}_{3-\delta}$  and b)  $\text{Nd}_{0.9}\text{Ca}_{0.1}\text{FeO}_{3-\delta}$  prior to catalytic reaction. The flakes on the surface are small pieces from the grinding after synthesis. No nanoparticles are observed before the catalytic reaction for the Co-doped perovskite.

### 3. Stability Tests for WGS Reactivity

To obtain the first insights into the long-term reaction stability of the novel perovskites, isothermal reactions were performed at 600 °C. We have chosen this high temperature to investigate the stability of the material under these harsh conditions and see if any rapid deactivation occurs. Below the results for the respective perovskites are shown (Figures S3-S7).

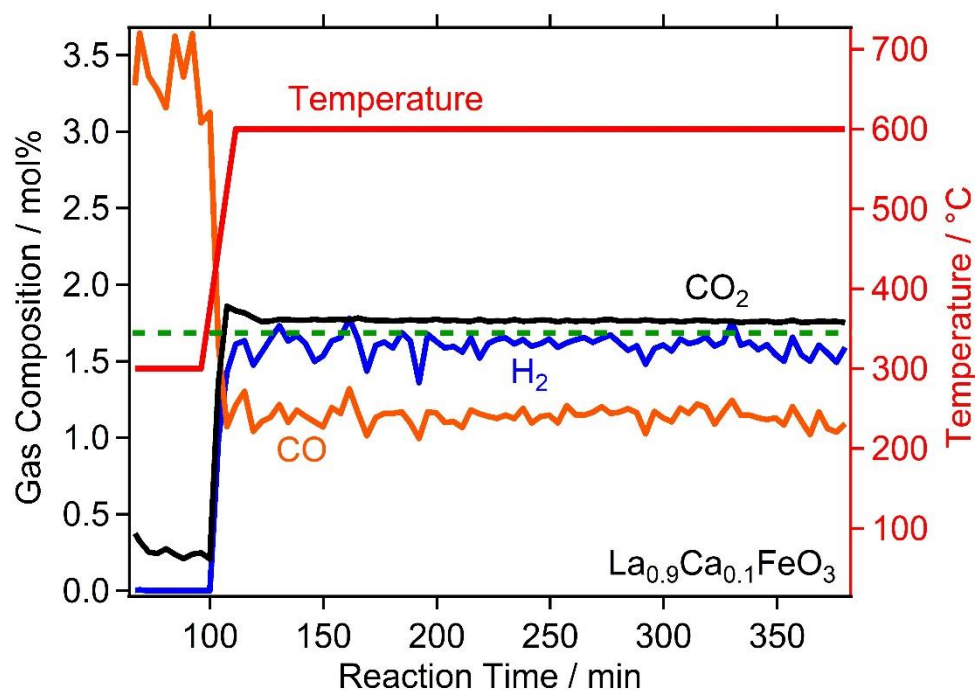

Figure S3: Isothermal WGS reaction at 600 °C for  $\text{La}_{0.9}\text{Ca}_{0.1}\text{FeO}_{3-\delta}$ . The dashed line serves as a guide for the eye. During the duration of the reaction (about 5 h), the catalyst showed stable reactivity without deactivation.

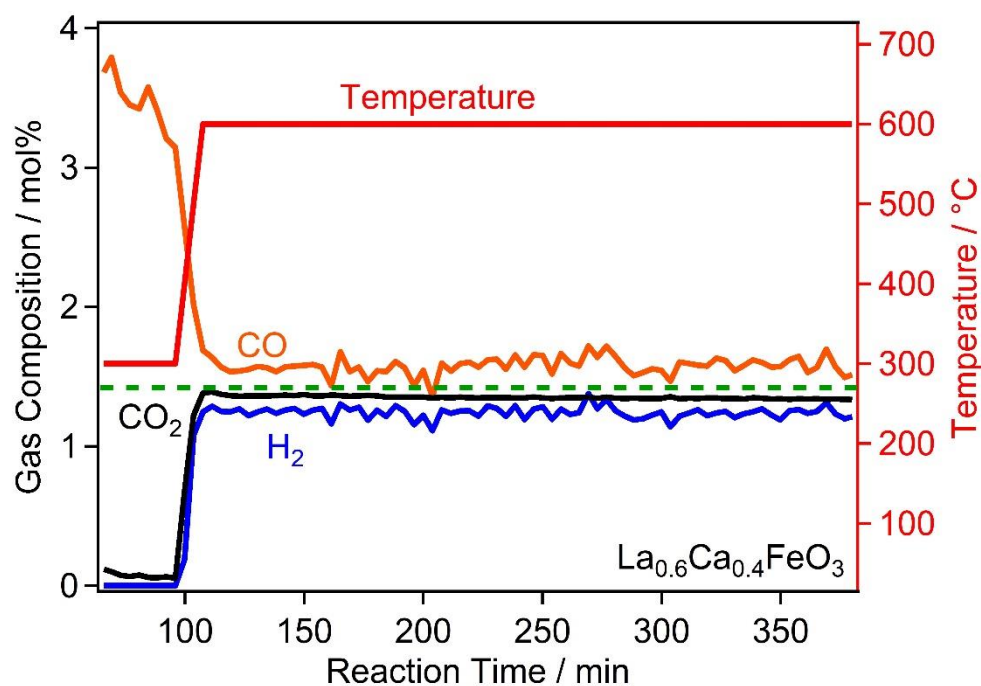

Figure S4: Isothermal WGS reaction at 600 °C for  $\text{La}_{0.6}\text{Ca}_{0.4}\text{FeO}_{3-\delta}$ . The dashed line serves as a guide for the eye. During the duration of the reaction (about 5 h) the catalyst showed stable reactivity without deactivation.

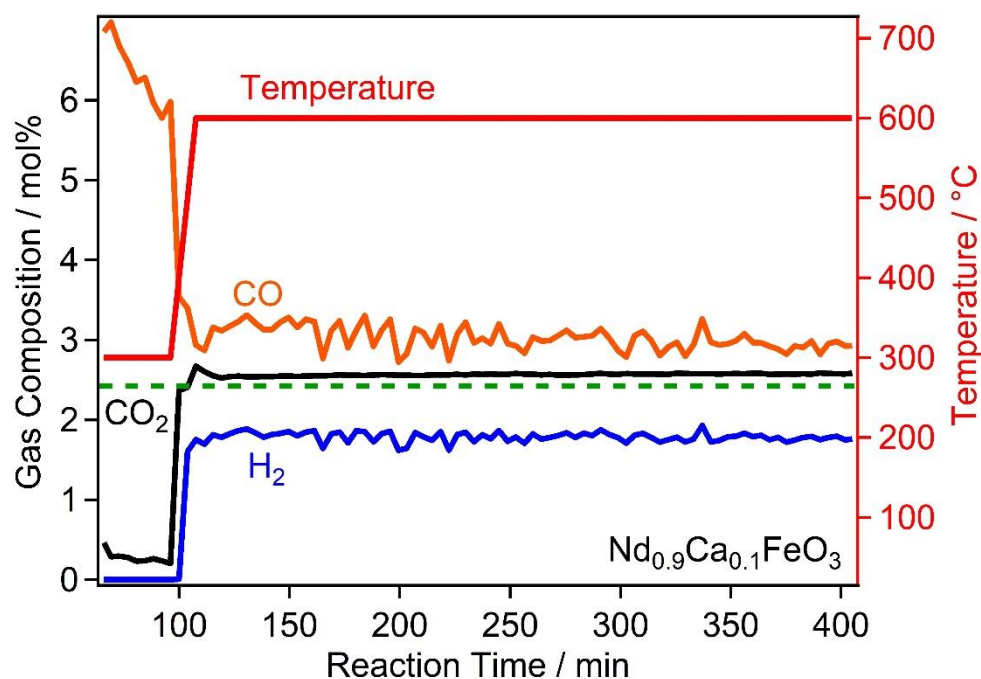

Figure S5: Isothermal WGS reaction at 600 °C for  $\text{Nd}_{0.9}\text{Ca}_{0.1}\text{FeO}_{3-\delta}$ . The dashed line serves as a guide for the eye. During the duration of the reaction (about 5 h), the catalyst showed stable reactivity without deactivation.

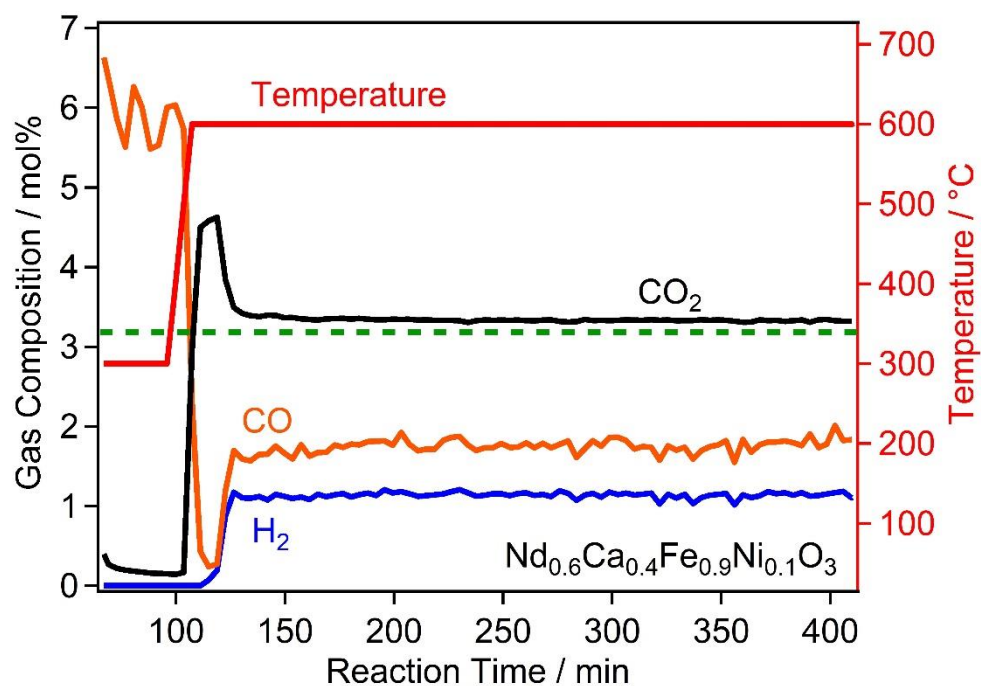

Figure S4: Isothermal WGS reaction at 600 °C for  $\text{Nd}_{0.6}\text{Ca}_{0.4}\text{Fe}_{0.9}\text{Ni}_{0.1}\text{O}_{3-\delta}$ . The dashed line serves as a guide for the eye. During the duration of the reaction (about 5 h) the catalyst showed stable reactivity without deactivation.

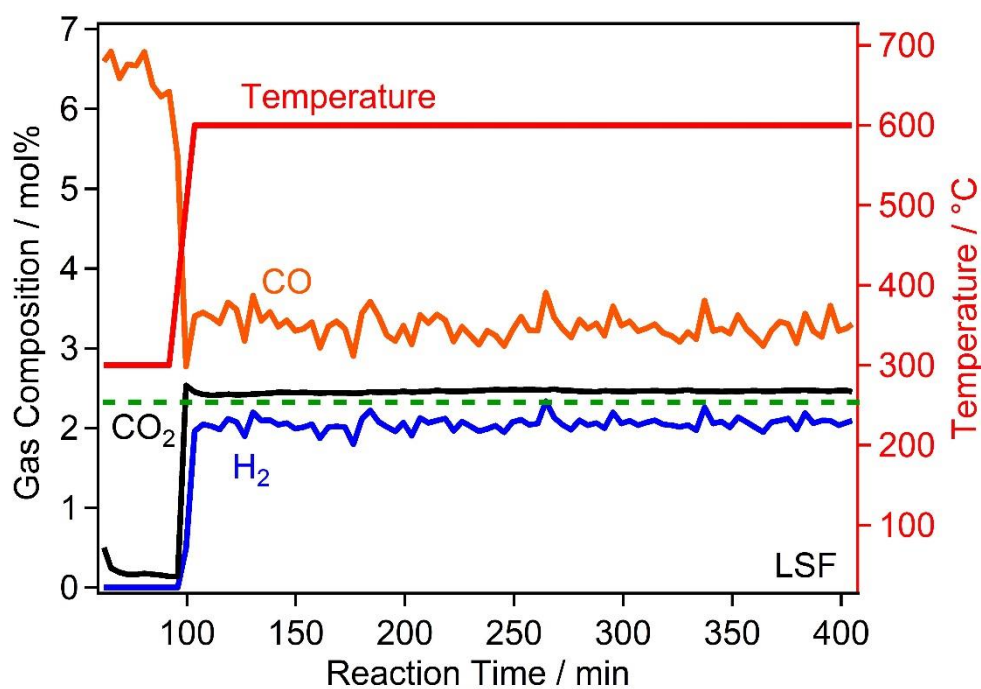

Figure S7: Isothermal WGS reaction at 600 °C for LSF. The dashed line serves as a guide for the eye. During the duration of the reaction (about 5 h), the catalyst showed stable reactivity without deactivation.

**Funding:** This research was funded by the European Research Council (ERC) under the European Union's Horizon 2020 research and innovation programme, grant agreement no. 755744/ERC—Starting Grant TUCAS.

**Conflicts of Interest:** The authors declare no conflict of interest.

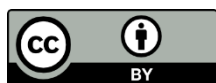

© 2020 by the authors. Submitted for possible open access publication under the terms and conditions of the Creative Commons Attribution (CC BY) license (<http://creativecommons.org/licenses/by/4.0/>).
